# Supplementary material for: The Occurrence of Potential Harmful Cyanobacteria and Cyanotoxins in the Obrzyca River (Poland), a Source of Drinking Water
Source: PubMed Central journal article supplement (PMC7290984; doi:10.3390/toxins12050284), 2020-04-28
Supplement: toxins-12-00284-s001.pdf [file toxins-12-00284-s001.pdf]

## Supplementary Materia: The Occurrence of Potential Harmful Cyanobacteria and Cyanotoxins in the Obrzyca River (Poland), a Source of Drinking Water

**Table S1.** List of full species names cited in the manuscript.

|                                                                   |
|-------------------------------------------------------------------|
| <i>Aphanizomenon flos-aquae</i> (Ralfs ex Bornet & Flahault),     |
| <i>Cuspidothrix issatchenkoi</i> (Usachev)                        |
| <i>Cylindrospermopsis raciborskii</i> (Woloszynska)               |
| <i>Dolichospermum flos-aquae</i> (Brébisson ex Bornet & Flahault) |
| <i>Dolichospermum planctonicum</i> (Brunnthaler)                  |
| <i>Microcystis aeruginosa</i> (Kützing)                           |
| <i>Microcystis flos-aquae</i> (Wittrock)                          |
| <i>Microcystis viridis</i> (A.Braun)                              |
| <i>Microcystis wesenbergii</i> (Komárek)                          |
| <i>Oscillatoria angusta</i> (Koppe)                               |
| <i>Planktothrix agardhii</i> (Anagn. & Komárek)                   |
| <i>Pseudoanabaena limnetica</i> (Lemmerman)                       |
| <i>Woronichinia naegeliana</i> (Unger)                            |

**Table S2.** Determination of 240-h LC 50 with *D. tigrina* for sample collected in August 2019 at Uście point.

| Extract concentration [%] | Number of animals <i>n</i> | Number of dead animals         |                                    | Logarithm of concentration <i>x</i> | Empirical probites <i>y</i> |
|---------------------------|----------------------------|--------------------------------|------------------------------------|-------------------------------------|-----------------------------|
|                           |                            | Number of individuals <i>r</i> | Percentage of individuals <i>P</i> |                                     |                             |
| 1.                        | 2.                         | 3.                             | 4.                                 | 5.                                  | 6.                          |
| 71.4                      | 30                         | 21                             | 70.00                              | 1.85                                | 5.524                       |
| 51.02                     | 30                         | 18                             | 60.00                              | 1.71                                | 5.2533                      |
| 36.44                     | 30                         | 13                             | 43.33                              | 1.56                                | 4.8318                      |
| 26.03                     | 30                         | 10                             | 33.33                              | 1.42                                | 4.5684                      |
| 18.6                      | 30                         | 8                              | 26.67                              | 1.27                                | 4.3781                      |
| 13.28                     | 30                         | 5                              | 16.67                              | 1.12                                | 4.0339                      |
| 9.48                      | 30                         | 3                              | 10.00                              | 0.98                                | 3.7184                      |
| 6.7                       | 30                         | 1                              | 3.33                               | 0.83                                | 3.1616                      |

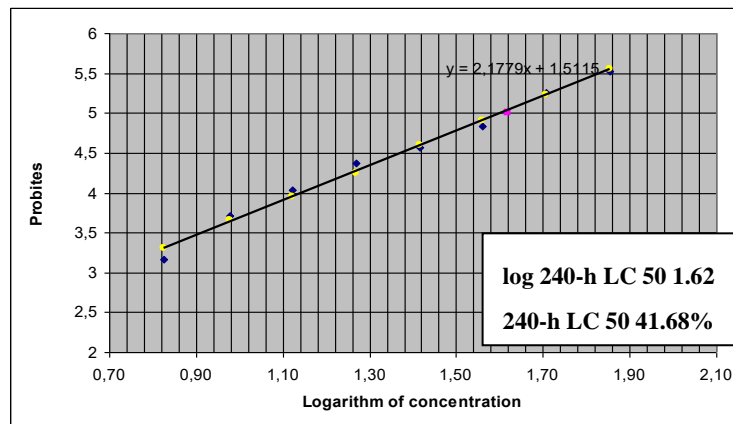

Figure S1. Calculation of LC 50 by graphical method.

Table S3. Checking the graphical method of calculating LC 50 using the  $\chi^2$  test.

| Logarithm of concentration<br>X                                                  | y<br>theoretical | P<br>theoretical | n  | r  | nP    | r-nP  | $\frac{(r - nP)^2}{nP(1 - P)}$ |
|----------------------------------------------------------------------------------|------------------|------------------|----|----|-------|-------|--------------------------------|
| 1.                                                                               | 2.               | 3.               | 4. | 5. | 6.    | 7.    | 8.                             |
| 1.85                                                                             | 5.55             | 0.709            | 30 | 21 | 21.27 | -0.27 | 0.0118                         |
| 1.71                                                                             | 5.23             | 0.591            | 30 | 18 | 17.73 | 0.27  | 0.0101                         |
| 1.56                                                                             | 4.9              | 0.461            | 30 | 13 | 13.83 | -0.83 | 0.0924                         |
| 1.42                                                                             | 4.60             | 0.345            | 30 | 10 | 10.35 | -0.35 | 0.0181                         |
| 1.27                                                                             | 4.25             | 0.227            | 30 | 8  | 6.81  | 1.19  | 0.2690                         |
| 1.12                                                                             | 3.95             | 0.147            | 30 | 5  | 4.41  | 0.59  | 0.0925                         |
| 0.98                                                                             | 3.65             | 0.089            | 30 | 3  | 2.67  | 0.33  | 0.0448                         |
| 0.83                                                                             | 3.3              | 0.045            | 30 | 1  | 1.35  | -0.35 | 0.0950                         |
| Number of degrees of freedom: $f = 8 - 2 = 6$ . For $\chi^2 0,6337$ ; $P = 99\%$ |                  |                  |    |    |       |       | 0.6337                         |

Table S4. Determination of 240-h LC 50 with *D. tigrina* for sample collected in September 2019 at Uście point.

| Extract concentration [%] | Number of animals n | Number of dead animals  |                             | Logarithm of concentration x | Empirical probites y |
|---------------------------|---------------------|-------------------------|-----------------------------|------------------------------|----------------------|
|                           |                     | Number of individuals r | Percentage of individuals P |                              |                      |
| 1.                        | 2.                  | 3.                      | 4.                          | 5.                           | 6.                   |
| 71.4                      | 30                  | 28                      | 93.33                       | 1.85                         | 6.499                |
| 51.02                     | 30                  | 26                      | 86.67                       | 1.71                         | 6.1123               |
| 36.44                     | 30                  | 22                      | 73.33                       | 1.56                         | 5.6219               |
| 26.03                     | 30                  | 16                      | 53.33                       | 1.42                         | 5.0828               |
| 18.6                      | 30                  | 14                      | 46.67                       | 1.27                         | 5.0828               |
| 13.28                     | 30                  | 7                       | 23.33                       | 1.12                         | 4.9172               |
| 9.48                      | 30                  | 5                       | 16.67                       | 0.98                         | 4.271                |
| 6.7                       | 30                  | 1                       | 3.33                        | 0.83                         | 3.1616               |

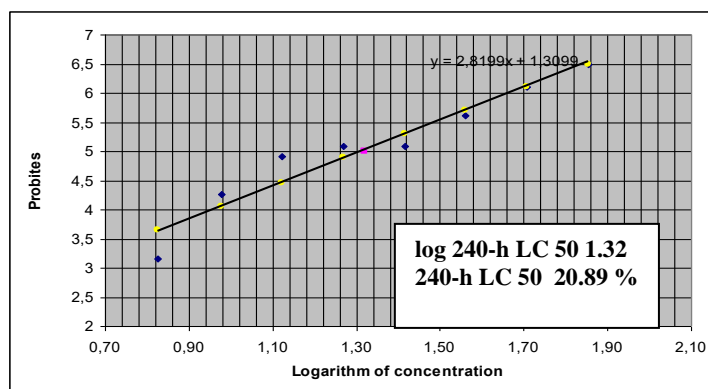

Figure S2. Calculation of LC 50 by graphical method.

Table S5. Checking the graphical method of calculating LC 50 using the  $\chi^2$  test.

| Logarithm of concentration<br>X                                                 | y<br>theoretical | P<br>theoretical | n  | r  | nP    | r-nP  | $\frac{(r - nP)^2}{nP(1 - P)}$ |
|---------------------------------------------------------------------------------|------------------|------------------|----|----|-------|-------|--------------------------------|
| 1.                                                                              | 2.               | 3.               | 4. | 5. | 6.    | 7.    | 8.                             |
| 1.85                                                                            | 6.5              | 0.934            | 30 | 28 | 28.02 | -0.02 | 0.0002                         |
| 1.71                                                                            | 6.1              | 0.865            | 30 | 26 | 25.95 | 0.05  | 0.0007                         |
| 1.56                                                                            | 5.7              | 0.759            | 30 | 22 | 22.77 | -0.77 | 0.1080                         |
| 1.42                                                                            | 5.30             | 0.618            | 30 | 16 | 18.54 | -2.54 | 0.9109                         |
| 1.27                                                                            | 4.9              | 0.461            | 30 | 14 | 13.83 | 0.17  | 0.0039                         |
| 1.12                                                                            | 4.45             | 0.292            | 30 | 7  | 8.76  | -1.76 | 0.4994                         |
| 0.98                                                                            | 4.05             | 0.172            | 30 | 5  | 5.16  | -0.16 | 0.0060                         |
| 0.83                                                                            | 3.65             | 0.089            | 30 | 1  | 2.67  | -1.67 | 1.1466                         |
| Number of degrees of freedom: $f = 8 - 2 = 6$ . For $\chi^2$ 2,6758; $P = 80\%$ |                  |                  |    |    |       |       | 2.6758                         |

Table S6. Determination of 240-h LC 50 with *D. tigrina* for sample collected in October 2019 at Uście point.

| Extract concentration [%] | Number of animals <i>n</i> | Number of dead animals         |                                    | Logarithm of concentration <i>x</i> | Empirical probites <i>y</i> |
|---------------------------|----------------------------|--------------------------------|------------------------------------|-------------------------------------|-----------------------------|
|                           |                            | Number of individuals <i>r</i> | Percentage of individuals <i>P</i> |                                     |                             |
| 1.                        | 2.                         | 3.                             | 4.                                 | 5.                                  | 6.                          |
| 71.4                      | 30                         | 25                             | 83.33                              | 1.85                                | 5.966                       |
| 51.02                     | 30                         | 18                             | 60.00                              | 1.71                                | 5.2533                      |
| 36.44                     | 30                         | 14                             | 46.67                              | 1.56                                | 4.9172                      |
| 26.03                     | 30                         | 10                             | 33.33                              | 1.42                                | 4.5684                      |
| 18.6                      | 30                         | 8                              | 26.67                              | 1.27                                | 4.3781                      |
| 13.28                     | 30                         | 5                              | 16.67                              | 1.12                                | 4.0339                      |
| 9.48                      | 30                         | 2                              | 6.67                               | 0.98                                | 3.5015                      |
| 6.7                       | 30                         | 1                              | 3.33                               | 0.83                                | 3.1616                      |

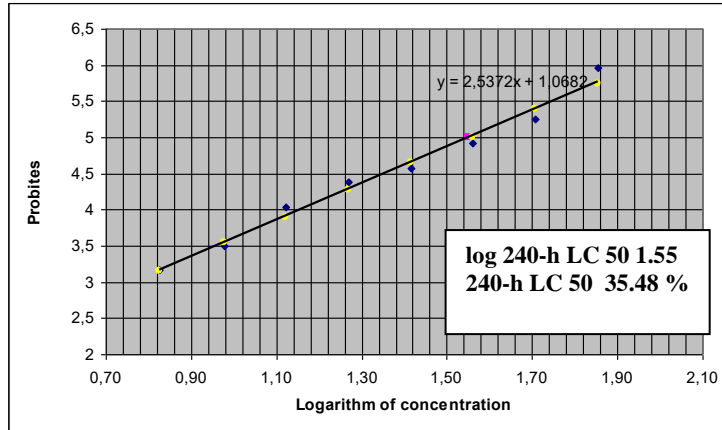

Figure S3. Calculation of LC 50 by graphical method.

Table S7. Checking the graphical method of calculating LC 50 using the  $\chi^2$  test.

| Logarithm of concentration<br>X                                                 | y<br>theoretical | P<br>theoretical | n  | r  | nP    | r-nP  | $\frac{(r - nP)^2}{nP(1 - P)}$ |
|---------------------------------------------------------------------------------|------------------|------------------|----|----|-------|-------|--------------------------------|
| 1.                                                                              | 2.               | 3.               | 4. | 5. | 6.    | 7.    | 8.                             |
| 1.85                                                                            | 5.75             | 0.774            | 30 | 25 | 23.22 | 1.78  | 0.6038                         |
| 1.71                                                                            | 5.40             | 0.656            | 30 | 18 | 19.68 | -1.68 | 0.4169                         |
| 1.56                                                                            | 5.00             | 0.50             | 30 | 14 | 15    | -1    | 0.1333                         |
| 1.42                                                                            | 4.65             | 0.364            | 30 | 10 | 10.92 | -0.92 | 0.1219                         |
| 1.27                                                                            | 4.28             | 0.236            | 30 | 8  | 7.08  | 0.92  | 0.1565                         |
| 1.12                                                                            | 3.90             | 0.136            | 30 | 5  | 4.08  | 0.92  | 0.2401                         |
| 0.98                                                                            | 3.55             | 0.074            | 30 | 2  | 2.22  | -0.22 | 0.0235                         |
| 0.83                                                                            | 3.15             | 0.032            | 30 | 1  | 0.96  | 0.04  | 0.0017                         |
| Number of degrees of freedom: $f = 8 - 2 = 6$ . For $\chi^2$ 1,6977; $P = 94\%$ |                  |                  |    |    |       |       | 1.6977                         |
